# Supplementary material for: Strain engineering of antiperovskite materials for solid-state Li batteries: a computation-guided substitution approach
Source: Royal Society of Chemistry journal article supplement (doi:10.1039/d3ta03543c), 2023-01-01
Supplement: d3ta03543c1.pdf [file d3ta03543c1.pdf]

## Supplementary Information

# Strain Engineering of Antiperovskite Materials Solid-State Li Batteries: A Computation-Guided Substitution Approach

Longyun Shen,<sup>a†</sup> Yuhao Wang,<sup>b†</sup> Jing Yu,<sup>be†</sup> Guodong Zhou,<sup>b</sup> Jiapeng Liu,<sup>bf</sup> Matthew J. Robson,<sup>b</sup> Yanguang Zhou,<sup>\*b</sup> Mohammed B. Effat,<sup>\*d</sup> and Francesco Ciucci<sup>\*bc</sup>

a. Division of Emerging Interdisciplinary Areas, The Hong Kong University of Science and Technology, Clear Water Bay, Hong Kong SAR, P. R. China.

b. Department of Mechanical and Aerospace Engineering, The Hong Kong University of Science and Technology, Clear Water Bay, Hong Kong, China.

c. Chair of Electrode Design for Electrochemical Storage Systems, University of Bayreuth, Bayreuth, Germany.

d. Department of Mechanical Power Engineering, Assiut University, Assiut, Egypt.

e. Department of Chemistry and Chemical Engineering, Zhongkai University of Agriculture and Engineering, Guangzhou, P. R. China

f. School of Advanced Energy, Sun Yat-Sen University, Shenzhen, P.R. China

† These authors contributed equally.

# 1 Ground-state structures

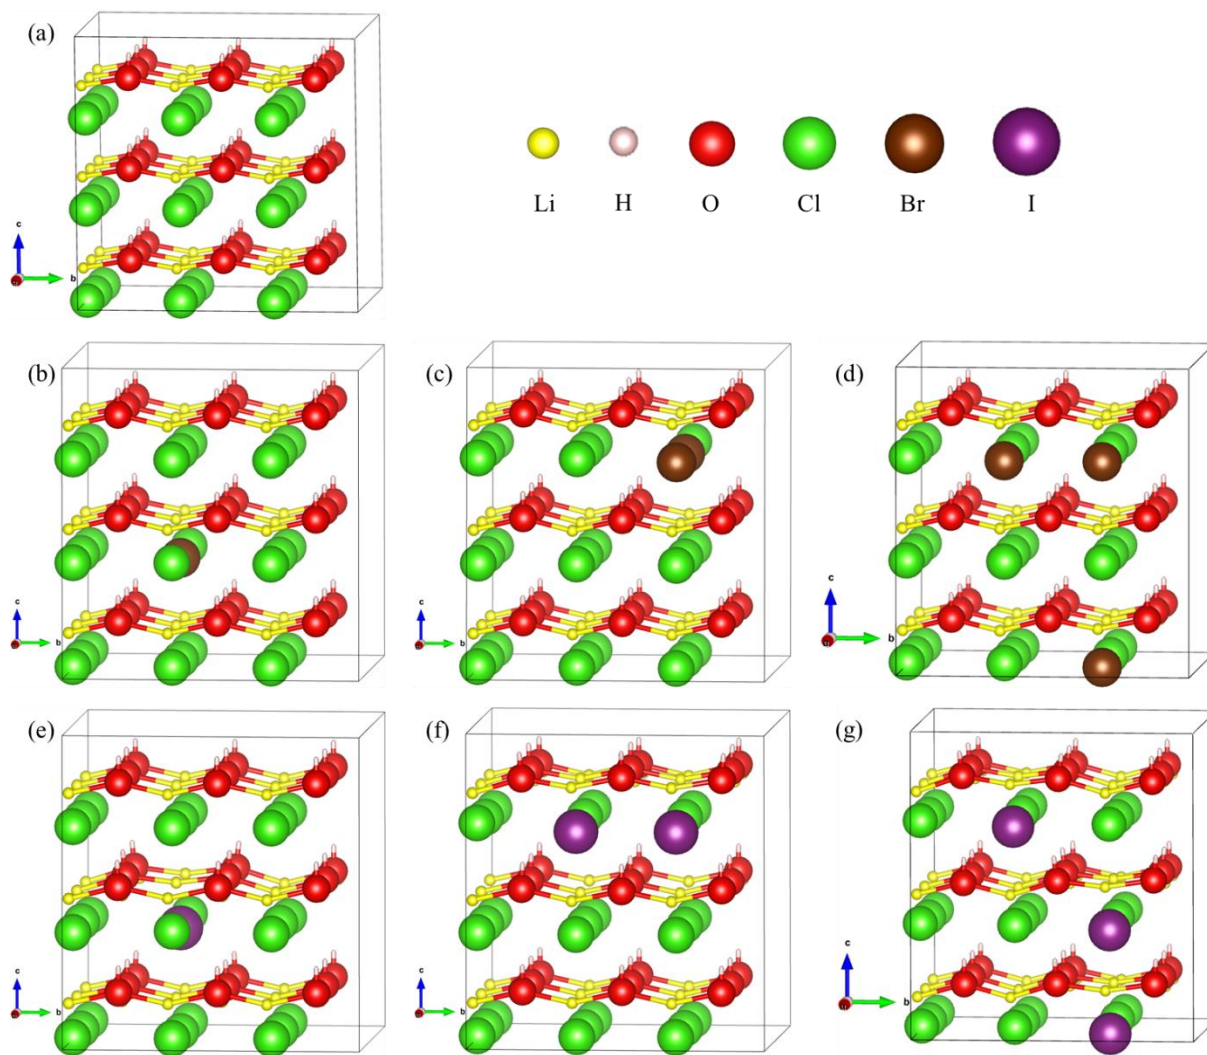

## 2 Band gaps and electrochemical stability window

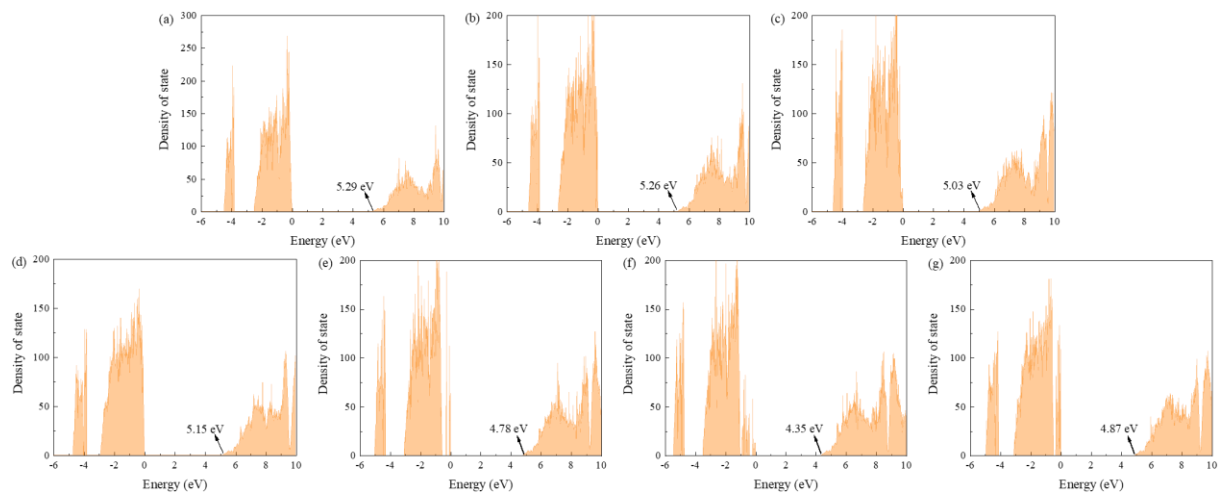

**Figure S2.** The density of states of (a)  $\text{Li}_2\text{OHCl}$ ; (b)  $\text{Li}_2\text{OHCl}_{26/27}\text{Br}_{1/27}$ ; (c)  $\text{Li}_2\text{OHCl}_{25/27}\text{Br}_{2/27}$ ; (d)  $\text{Li}_2\text{OHCl}_{8/9}\text{I}_{1/9}$ ; (e)  $\text{Li}_2\text{OHCl}_{26/27}\text{I}_{1/27}$ ; (f)  $\text{Li}_2\text{OHCl}_{25/27}\text{I}_{2/27}$ ; and (g)  $\text{Li}_2\text{OHCl}_{8/9}\text{I}_{1/9}$ .

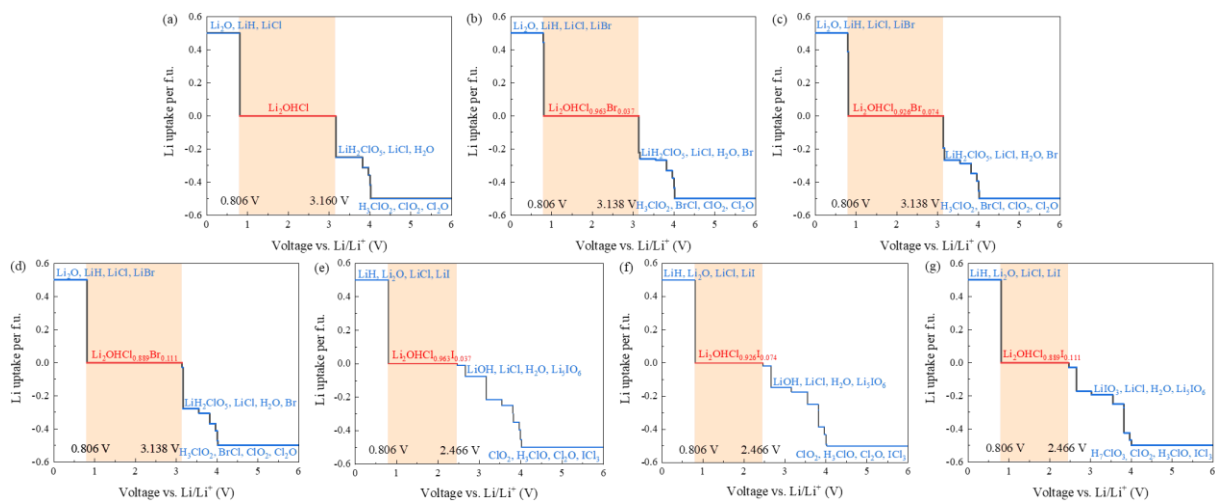

**Figure S3.** The electrochemical stability window of (a)  $\text{Li}_2\text{OHCl}$ ; (b)  $\text{Li}_2\text{OHCl}_{26/27}\text{Br}_{1/27}$ ; (c)  $\text{Li}_2\text{OHCl}_{25/27}\text{Br}_{2/27}$ ; (d)  $\text{Li}_2\text{OHCl}_{8/9}\text{I}_{1/9}$ ; (e)  $\text{Li}_2\text{OHCl}_{26/27}\text{I}_{1/27}$ ; (f)  $\text{Li}_2\text{OHCl}_{25/27}\text{I}_{2/27}$ ; and (g)  $\text{Li}_2\text{OHCl}_{8/9}\text{I}_{1/9}$ .

**Table S1.** Decomposition reactions between LiBr and lithium metal.

| Decomposition reaction                                | Voltage (V) |
|-------------------------------------------------------|-------------|
| $2 \text{LiBr} \Rightarrow 2 \text{LiBr}$             | 0.0         |
| $2 \text{LiBr} \Rightarrow \text{Br}_2 + 2 \text{Li}$ | 3.138       |

**Table S2.** Decomposition reactions between LiI and lithium metal.

| Decomposition reaction                              | Voltage (V) |
|-----------------------------------------------------|-------------|
| $2 \text{LiI} \Rightarrow 2 \text{Li}$              | 0.0         |
| $2 \text{LiI} \Rightarrow \text{I}_2 + 2 \text{Li}$ | 2.466       |

**Table S3.** Decomposition reactions between Li<sub>2</sub>OHCl and lithium metal.

| Decomposition reaction                                                                                         | Voltage (V) |
|----------------------------------------------------------------------------------------------------------------|-------------|
| Li <sub>2</sub> OHCl + 2 Li => LiH + Li <sub>2</sub> O + LiCl                                                  | 0.0         |
| Li <sub>2</sub> OHCl => LiCl + LiOH                                                                            | 0.806       |
| Li <sub>2</sub> OHCl => 0.125 LiH <sub>2</sub> ClO <sub>5</sub> + 0.875 LiCl + 0.375 H <sub>2</sub> O + Li     | 3.160       |
| Li <sub>2</sub> OHCl => 0.25 ClO <sub>2</sub> + 0.75 LiCl + 0.5 H <sub>2</sub> O + 1.25 Li                     | 3.814       |
| Li <sub>2</sub> OHCl => 0.143 H <sub>7</sub> ClO <sub>3</sub> + 0.286 ClO <sub>2</sub> + 0.571 LiCl + 1.429 Li | 3.960       |
| Li <sub>2</sub> OHCl => 0.333 H <sub>3</sub> ClO + 0.333 ClO <sub>2</sub> + 0.333 LiCl + 1.667 Li              | 3.996       |
| Li <sub>2</sub> OHCl => 0.333 H <sub>3</sub> ClO + 0.222 ClO <sub>2</sub> + 0.222 Cl <sub>2</sub> O + 2 Li     | 4.020       |

**Table S4.** Decomposition reactions between  $\text{Li}_2\text{OHCl}_{26/27}\text{Br}_{1/27}$  and lithium metal.

| Decomposition reaction                                                                                                                                                                           | Voltage (V) |
|--------------------------------------------------------------------------------------------------------------------------------------------------------------------------------------------------|-------------|
| $\text{Li}_2\text{OHCl}_{26/27}\text{Br}_{1/27} + 2 \text{Li} \Rightarrow \text{Li}_2\text{O} + \text{LiH} + 26/27 \text{LiCl} + 1/27 \text{LiBr}$                                               | 0.0         |
| $\text{Li}_2\text{OHCl}_{26/27}\text{Br}_{1/27} + 1.778 \text{Li} \Rightarrow 1/27 \text{Li}_4\text{H}_3\text{BrO}_3 + 8/9 \text{Li}_2\text{O} + 8/9 \text{LiH} + 26/27 \text{LiCl}$             | 0.796       |
| $\text{Li}_2\text{OHCl}_{26/27}\text{Br}_{1/27} \Rightarrow 1/27 \text{Li}_4\text{H}_3\text{BrO}_3 + 26/27 \text{LiCl} + 8/9 \text{LiHO}$                                                        | 0.806       |
| $\text{Li}_2\text{OHCl}_{26/27}\text{Br}_{1/27} \Rightarrow 1/27 \text{Li}_4\text{H}_3\text{BrO}_3 + 0.85 \text{LiCl} + 1/9 \text{LiH}_2\text{ClO}_5 + 0.333 \text{H}_2\text{O} + 8/9 \text{Li}$ | 3.138       |
| $\text{Li}_2\text{OHCl}_{26/27}\text{Br}_{1/27} \Rightarrow 0.838 \text{LiCl} + 0.125 \text{LiH}_2\text{ClO}_5 + 0.375 \text{H}_2\text{O} + 1/27 \text{Br} + 1.037 \text{Li}$                    | 3.169       |
| $\text{Li}_2\text{OHCl}_{26/27}\text{Br}_{1/27} \Rightarrow 1/27 \text{BrCl} + 0.801 \text{LiCl} + 0.125 \text{LiH}_2\text{ClO}_5 + 0.375 \text{H}_2\text{O} + 1.074 \text{Li}$                  | 3.555       |
| $\text{Li}_2\text{OHCl}_{26/27}\text{Br}_{1/27} \Rightarrow 1/27 \text{BrCl} + 0.676 \text{LiCl} + 0.25 \text{ClO}_2 + 0.5 \text{H}_2\text{O} + 1.324 \text{Li}$                                 | 3.814       |
| $\text{Li}_2\text{OHCl}_{26/27}\text{Br}_{1/27} \Rightarrow 0.143 \text{H}_7\text{ClO}_3 + 1/27 \text{BrCl} + 0.497 \text{LiCl} + 0.286 \text{ClO}_2 + 1.503 \text{Li}$                          | 3.960       |
| $\text{Li}_2\text{OHCl}_{26/27}\text{Br}_{1/27} \Rightarrow 0.333 \text{H}_3\text{ClO} + 1/27 \text{BrCl} + 0.259 \text{LiCl} + 0.333 \text{ClO}_2 + 1.741 \text{Li}$                            | 3.996       |
| $\text{Li}_2\text{OHCl}_{26/27}\text{Br}_{1/27} \Rightarrow 0.333 \text{H}_3\text{ClO} + 1/27 \text{BrCl} + 0.247 \text{ClO}_2 + 0.173 \text{Cl}_2\text{O} + 2 \text{Li}$                        | 4.020       |



**Table S5.** Decomposition reactions between  $\text{Li}_2\text{OHCl}_{25/27}\text{Br}_{2/27}$  and lithium metal.

| Decomposition reaction                                                                                                                                                                           | Voltage (V) |
|--------------------------------------------------------------------------------------------------------------------------------------------------------------------------------------------------|-------------|
| $\text{Li}_2\text{OHCl}_{25/27}\text{Br}_{2/27} + 2 \text{Li} \Rightarrow \text{Li}_2\text{O} + \text{LiH} + 25/27 \text{LiCl} + 2/27 \text{LiBr}$                                               | 0.0         |
| $\text{Li}_2\text{OHCl}_{25/27}\text{Br}_{2/27} + 1.556 \text{Li} \Rightarrow 2/27 \text{Li}_4\text{H}_3\text{BrO}_3 + 0.778 \text{Li}_2\text{O} + 0.778 \text{LiH} + 25/27 \text{LiCl}$         | 0.796       |
| $\text{Li}_2\text{OHCl}_{25/27}\text{Br}_{2/27} \Rightarrow 2/27 \text{Li}_4\text{H}_3\text{BrO}_3 + 25/27 \text{LiCl} + 0.778 \text{LiHO}$                                                      | 0.806       |
| $\text{Li}_2\text{OHCl}_{25/27}\text{Br}_{2/27} \Rightarrow 2/27 \text{Li}_4\text{H}_3\text{BrO}_3 + 0.83 \text{LiCl} + 0.1 \text{LiH}_2\text{ClO}_5 + 0.29 \text{H}_2\text{O} + 0.78 \text{Li}$ | 3.138       |
| $\text{Li}_2\text{OHCl}_{25/27}\text{Br}_{2/27} \Rightarrow 0.801 \text{LiCl} + 0.125 \text{LiH}_2\text{ClO}_5 + 0.375 \text{H}_2\text{O} + 2/27 \text{Br} + 1.074 \text{Li}$                    | 3.169       |
| $\text{Li}_2\text{OHCl}_{25/27}\text{Br}_{2/27} \Rightarrow 2/27 \text{BrCl} + 0.727 \text{LiCl} + 0.125 \text{LiH}_2\text{ClO}_5 + 0.375 \text{H}_2\text{O} + 1.148 \text{Li}$                  | 3.555       |
| $\text{Li}_2\text{OHCl}_{25/27}\text{Br}_{2/27} \Rightarrow 2/27 \text{BrCl} + 0.602 \text{LiCl} + 0.25 \text{ClO}_2 + 0.5 \text{H}_2\text{O} + 1.398 \text{Li}$                                 | 3.814       |
| $\text{Li}_2\text{OHCl}_{25/27}\text{Br}_{2/27} \Rightarrow 0.143 \text{H}_7\text{ClO}_3 + 2/27 \text{BrCl} + 0.423 \text{LiCl} + 0.286 \text{ClO}_2 + 1.577 \text{Li}$                          | 3.960       |
| $\text{Li}_2\text{OHCl}_{25/27}\text{Br}_{2/27} \Rightarrow 0.333 \text{H}_3\text{ClO} + 2/27 \text{BrCl} + 0.186 \text{LiCl} + 0.333 \text{ClO}_2 + 1.815 \text{Li}$                            | 3.996       |
| $\text{Li}_2\text{OHCl}_{25/27}\text{Br}_{2/27} \Rightarrow 0.333 \text{H}_3\text{ClO} + 2/27 \text{BrCl} + 0.272 \text{ClO}_2 + 3.333 \text{Cl}_2\text{O} + 2 \text{Li}$                        | 4.020       |

**Table S6.** Decomposition reactions between  $\text{Li}_2\text{OHCl}_{8/9}\text{Br}_{1/9}$  and lithium metal.

| Decomposition reaction                                                                                                                                                             | Voltage (V) |
|------------------------------------------------------------------------------------------------------------------------------------------------------------------------------------|-------------|
| $\text{Li}_2\text{OHCl}_{8/9}\text{Br}_{1/9} + 2 \text{Li} \Rightarrow \text{Li}_2\text{O} + \text{LiH} + 8/9 \text{LiCl} + 1/9 \text{LiBr}$                                       | 0.0         |
| $\text{Li}_2\text{OHCl}_{8/9}\text{Br}_{1/9} + 1.333 \text{Li} \Rightarrow 1/9 \text{Li}_4\text{H}_3\text{BrO}_3 + 0.667 \text{Li}_2\text{O} + 0.667 \text{LiH} + 8/9 \text{LiCl}$ | 0.796       |
| $\text{Li}_2\text{OHCl}_{8/9}\text{Br}_{1/9} \Rightarrow 8/9 \text{LiCl} + 1/9 \text{LiBr} + \text{LiOH}$                                                                          | 0.806       |
| $\text{Li}_2\text{OHCl}_{8/9}\text{Br}_{1/9} \Rightarrow 8/9 \text{LiCl} + \text{LiOH} + 1/9 \text{Br} + 1/9 \text{Li}$                                                            | 3.138       |
| $\text{Li}_2\text{OHCl}_{8/9}\text{Br}_{1/9} \Rightarrow 0.764 \text{LiCl} + 0.125 \text{LiH}_2\text{ClO}_5 + 0.375 \text{H}_2\text{O} + 1/9 \text{Br} + 1.111 \text{Li}$          | 3.169       |
| $\text{Li}_2\text{OHCl}_{8/9}\text{Br}_{1/9} \Rightarrow 1/9 \text{BrCl} + 0.653 \text{LiCl} + 0.125 \text{LiH}_2\text{ClO}_5 + 0.375 \text{H}_2\text{O} + 1.222 \text{Li}$        | 3.555       |
| $\text{Li}_2\text{OHCl}_{8/9}\text{Br}_{1/9} \Rightarrow 1/9 \text{BrCl} + 0.528 \text{LiCl} + 0.25 \text{ClO}_2 + 0.5 \text{H}_2\text{O} + 1.472 \text{Li}$                       | 3.814       |
| $\text{Li}_2\text{OHCl}_{8/9}\text{Br}_{1/9} \Rightarrow 0.143 \text{H}_7\text{ClO}_3 + 1/9 \text{BrCl} + 0.349 \text{LiCl} + 0.286 \text{ClO}_2 + 1.651 \text{Li}$                | 3.960       |
| $\text{Li}_2\text{OHCl}_{8/9}\text{Br}_{1/9} \Rightarrow 0.333 \text{H}_3\text{ClO} + 1/9 \text{BrCl} + 1/9 \text{LiCl} + 0.333 \text{ClO}_2 + 1.889 \text{Li}$                    | 3.996       |
| $\text{Li}_2\text{OHCl}_{8/9}\text{Br}_{1/9} \Rightarrow 0.333 \text{H}_3\text{ClO} + 1/9 \text{BrCl} + 0.296 \text{ClO}_2 + 2/27 \text{Cl}_2\text{O} + 2 \text{Li}$               | 4.020       |

**Table S7.** Decomposition reactions between  $\text{Li}_2\text{OHCl}_{26/27}\text{I}_{1/27}$  and lithium metal.

| Decomposition reaction                                                                                                                                                                             | Voltage (V) |
|----------------------------------------------------------------------------------------------------------------------------------------------------------------------------------------------------|-------------|
| $\text{Li}_{54}\text{O}_{27}\text{H}_{27}\text{Cl}_{26}\text{I} + 54 \text{Li} \Rightarrow 27 \text{LiH} + 27 \text{Li}_2\text{O} + \text{LiI} + 26 \text{LiCl}$                                   | 0.0         |
| $\text{Li}_{54}\text{O}_{27}\text{H}_{27}\text{Cl}_{26}\text{I} \Rightarrow 27 \text{LiHO} + \text{LiI} + 26 \text{LiCl}$                                                                          | 0.806       |
| $\text{Li}_{54}\text{O}_{27}\text{H}_{27}\text{Cl}_{26}\text{I} \Rightarrow 27 \text{LiHO} + 26 \text{LiCl} + \text{I} + \text{Li}$                                                                | 2.466       |
| $\text{Li}_{54}\text{O}_{27}\text{H}_{27}\text{Cl}_{26}\text{I} \Rightarrow 15 \text{LiHO} + 26 \text{LiCl} + 6 \text{H}_2\text{O} + \text{Li}_5\text{IO}_6 + 8 \text{Li}$                         | 2.660       |
| $\text{Li}_{54}\text{O}_{27}\text{H}_{27}\text{Cl}_{26}\text{I} \Rightarrow 1.875 \text{LiH}_2\text{ClO}_5 + 24.12 \text{LiCl} + 11.62 \text{H}_2\text{O} + \text{Li}_5\text{IO}_6 + 23 \text{Li}$ | 3.160       |
| $\text{Li}_{54}\text{O}_{27}\text{H}_{27}\text{Cl}_{26}\text{I} \Rightarrow 2.625 \text{LiH}_2\text{ClO}_5 + \text{LiIO}_3 + 23.37 \text{LiCl} + 10.88 \text{H}_2\text{O} + 27 \text{Li}$          | 3.547       |
| $\text{Li}_{54}\text{O}_{27}\text{H}_{27}\text{Cl}_{26}\text{I} \Rightarrow 5.25 \text{ClO}_2 + \text{LiIO}_3 + 20.75 \text{LiCl} + 13.5 \text{H}_2\text{O} + 32.25 \text{Li}$                     | 3.814       |
| $\text{Li}_{54}\text{O}_{27}\text{H}_{27}\text{Cl}_{26}\text{I} \Rightarrow 6.75 \text{ClO}_2 + \text{ICl}_3 + 16.25 \text{LiCl} + 13.5 \text{H}_2\text{O} + 37.75 \text{Li}$                      | 3.817       |
| $\text{Li}_{54}\text{O}_{27}\text{H}_{27}\text{Cl}_{26}\text{I} \Rightarrow 3.857 \text{H}_7\text{ClO}_3 + 7.714 \text{ClO}_2 + \text{ICl}_3 + 11.43 \text{LiCl} + 42.57 \text{Li}$                | 3.960       |
| $\text{Li}_{54}\text{O}_{27}\text{H}_{27}\text{Cl}_{26}\text{I} \Rightarrow 9 \text{ClO}_2 + 9 \text{H}_3\text{ClO} + \text{ICl}_3 + 5 \text{LiCl} + 49 \text{Li}$                                 | 3.996       |
| $\text{Li}_{54}\text{O}_{27}\text{H}_{27}\text{Cl}_{26}\text{I} \Rightarrow 7.333 \text{ClO}_2 + 9 \text{H}_3\text{ClO} + 3.333 \text{Cl}_2\text{O} + \text{ICl}_3 + 54 \text{Li}$                 | 4.020       |

**Table S8.** Decomposition reactions between  $\text{Li}_2\text{OHCl}_{25/27}\text{I}_{2/27}$  and lithium metal.

| Decomposition reaction                                                                                                                                                                    | Voltage (V) |
|-------------------------------------------------------------------------------------------------------------------------------------------------------------------------------------------|-------------|
| $\text{Li}_2\text{OHCl}_{25/27}\text{I}_{2/27} + 2 \text{Li} \Rightarrow \text{LiH} + \text{Li}_2\text{O} + 2/27 \text{LiI} + 25/27 \text{LiCl}$                                          | 0.0         |
| $\text{Li}_2\text{OHCl}_{25/27}\text{I}_{2/27} \Rightarrow \text{LiHO} + 2/27 \text{LiI} + 25/27 \text{LiCl}$                                                                             | 0.806       |
| $\text{Li}_2\text{OHCl}_{25/27}\text{I}_{2/27} \Rightarrow \text{LiHO} + 25/27 \text{LiCl} + 2/27 \text{I} + 2/27 \text{Li}$                                                              | 2.466       |
| $\text{Li}_2\text{OHCl}_{25/27}\text{I}_{2/27} \Rightarrow 1/9 \text{LiHO} + 25/27 \text{LiCl} + 0.444 \text{H}_2\text{O} + 2/27 \text{Li}_5\text{IO}_6 + 0.593 \text{Li}$                | 2.660       |
| $\text{Li}_2\text{OHCl}_{25/27}\text{I}_{2/27} \Rightarrow 0.014 \text{LiH}_2\text{ClO}_5 + 0.912 \text{LiCl} + 0.486 \text{H}_2\text{O} + 2/27 \text{Li}_5\text{IO}_6 + 0.704 \text{Li}$ | 3.160       |
| $\text{Li}_2\text{OHCl}_{25/27}\text{I}_{2/27} \Rightarrow 0.069 \text{LiH}_2\text{ClO}_5 + 2/27 \text{LiIO}_3 + 0.856 \text{LiCl} + 0.431 \text{H}_2\text{O} + \text{Li}$                | 3.547       |
| $\text{Li}_2\text{OHCl}_{25/27}\text{I}_{2/27} \Rightarrow 0.139 \text{ClO}_2 + 2/27 \text{LiIO}_3 + 0.787 \text{LiCl} + 0.5 \text{H}_2\text{O} + 1.139 \text{Li}$                        | 3.814       |
| $\text{Li}_2\text{OHCl}_{25/27}\text{I}_{2/27} \Rightarrow 0.25 \text{ClO}_2 + 2/27 \text{ICl}_3 + 0.454 \text{LiCl} + 0.5 \text{H}_2\text{O} + 1.546 \text{Li}$                          | 3.817       |
| $\text{Li}_2\text{OHCl}_{25/27}\text{I}_{2/27} \Rightarrow 0.143 \text{H}_7\text{ClO}_3 + 0.286 \text{ClO}_2 + 2/27 \text{ICl}_3 + 0.275 \text{LiCl} + 1.725 \text{Li}$                   | 3.960       |
| $\text{Li}_2\text{OHCl}_{25/27}\text{I}_{2/27} \Rightarrow 0.333 \text{ClO}_2 + 0.333 \text{H}_3\text{ClO} + 2/27 \text{ICl}_3 + 1/27 \text{LiCl} + 1.963 \text{Li}$                      | 3.996       |
| $\text{Li}_2\text{OHCl}_{25/27}\text{I}_{2/27} \Rightarrow 0.321 \text{ClO}_2 + 0.333 \text{H}_3\text{ClO} + 0.025 \text{Cl}_2\text{O} + 2/27 \text{ICl}_3 + 2 \text{Li}$                 | 4.020       |

**Table S9.** Decomposition reactions between  $\text{Li}_2\text{OHCl}_{8/9}\text{I}_{1/9}$  and lithium metal.

| Decomposition reaction                                                                                                                                                   | Voltage (V) |
|--------------------------------------------------------------------------------------------------------------------------------------------------------------------------|-------------|
| $\text{Li}_2\text{OHCl}_{8/9}\text{I}_{1/9} + 2 \text{Li} \Rightarrow \text{LiH} + \text{Li}_2\text{O} + 1/9 \text{LiI} + 8/9 \text{LiCl}$                               | 0.0         |
| $\text{Li}_2\text{OHCl}_{8/9}\text{I}_{1/9} \Rightarrow \text{LiOH} + 1/9 \text{LiI} + 8/9 \text{LiCl}$                                                                  | 0.806       |
| $\text{Li}_2\text{OHCl}_{8/9}\text{I}_{1/9} \Rightarrow \text{LiOH} + 8/9 \text{LiCl} + 1/9 \text{I} + 1/9 \text{Li}$                                                    | 2.466       |
| $\text{Li}_2\text{OHCl}_{8/9}\text{I}_{1/9} \Rightarrow 8/9 \text{LiCl} + 0.5 \text{H}_2\text{O} + 0.083 \text{Li}_5\text{IO}_6 + 0.028 \text{I} + 0.694 \text{Li}$      | 2.660       |
| $\text{Li}_2\text{OHCl}_{8/9}\text{I}_{1/9} \Rightarrow 0.056 \text{LiIO}_3 + 8/9 \text{LiCl} + 0.5 \text{H}_2\text{O} + 0.056 \text{Li}_5\text{IO}_6 + 0.778 \text{Li}$ | 3.026       |
| $\text{Li}_2\text{OHCl}_{8/9}\text{I}_{1/9} \Rightarrow 0.417 \text{LiH}_2\text{ClO}_5 + 1/9 \text{LiIO}_3 + 0.847 \text{LiCl} + 0.458 \text{H}_2\text{O} + \text{Li}$   | 3.547       |
| $\text{Li}_2\text{OHCl}_{8/9}\text{I}_{1/9} \Rightarrow 0.083 \text{ClO}_2 + 1/9 \text{LiIO}_3 + 0.806 \text{LiCl} + 0.5 \text{H}_2\text{O} + 1.083 \text{Li}$           | 3.814       |
| $\text{Li}_2\text{OHCl}_{8/9}\text{I}_{1/9} \Rightarrow 0.25 \text{ClO}_2 + 1/9 \text{ICl}_3 + 0.306 \text{LiCl} + 0.5 \text{H}_2\text{O} + 1.694 \text{Li}$             | 3.817       |
| $\text{Li}_2\text{OHCl}_{8/9}\text{I}_{1/9} \Rightarrow 0.144 \text{H}_7\text{ClO}_3 + 0.286 \text{ClO}_2 + 1/9 \text{ICl}_3 + 0.127 \text{LiCl} + 1.873 \text{Li}$      | 3.960       |
| $\text{Li}_2\text{OHCl}_{8/9}\text{I}_{1/9} \Rightarrow 0.067 \text{H}_7\text{ClO}_3 + 0.311 \text{ClO}_2 + 0.178 \text{H}_3\text{ClO} + 1/9 \text{ICl}_3 + 2 \text{Li}$ | 3.996       |

**Table S10.** Decomposition reactions between LiCl and lithium metal.

| Decomposition reaction                                | Voltage (V) |
|-------------------------------------------------------|-------------|
| $2 \text{LiCl} \Rightarrow 2 \text{LiCl}$             | 0.0         |
| $2 \text{LiCl} \Rightarrow \text{Cl}_2 + 2 \text{Li}$ | 4.254       |

### 3 Migration energy barriers and AIMD simulations

**Table S11.** Migration energy barriers of 1NN path in  $\text{Li}_2\text{OHCl}_{1-x}\text{Br}_x$ .

| $x$  | Energy barrier (eV)         | Weighted Mean migration energy barrier (eV) | Energy (eV)                                                                       |
|------|-----------------------------|---------------------------------------------|-----------------------------------------------------------------------------------|
| 0    | 0.2612                      | 0.2612                                      | 0, 0.1087, 0.2612, 0.1018, -0.0013                                                |
| 1/27 | Near: 0.2339<br>Far: 0.2149 | 0.2157                                      | Near: 0, 0.0813, 0.2339, 0.0819, 0.0101<br>Far: 0, 0.0791, 0.2149, 0.0734, 0.0002 |
| 2/27 | Near: 0.2429<br>Far: 0.2262 | 0.2274                                      | Near: 0, 0.0846, 0.2429, 0.1217, 0.0169<br>Far: 0, 0.1071, 0.2262, 0.1149, 0.0095 |
| 1/9  | Near: 0.2754<br>Far: 0.2338 | 0.2380                                      | Near: 0, 0.1182, 0.2754, 0.117, 0.0115<br>Far: 0, 0.1059, 0.2338, 0.104, 0.0111   |

**Table S12.** Migration energy barriers of 1NN path in  $\text{Li}_2\text{OHCl}_{1-x}\text{I}_x$ .

| $x$  | Energy barrier (eV)         | Weighted Mean migration energy barrier (eV) | Energy (eV)                                                                        |
|------|-----------------------------|---------------------------------------------|------------------------------------------------------------------------------------|
| 0    | 0.2612                      | 0.2612                                      | 0, 0.1087, 0.2612, 0.1018, -0.0013                                                 |
| 1/27 | Near: 0.2214<br>Far: 0.1816 | 0.1831                                      | Near: 0, 0.0029, 0.2214, 0.0001, 0.0001<br>Far: 0, 0.0652, 0.1816, 0.0412, -0.0043 |
| 2/27 | Near: 0.255<br>Far: 0.1571  | 0.1652                                      | Near: 0, 0.0671, 0.255, 0.1712, 0.0563<br>Far: 0, 0.0587, 0.1571, 0.05, -0.0063    |
| 1/9  | Near: 0.2671<br>Far: 0.1906 | 0.1970                                      | Near: 0, 0.1052, 0.2671, 0.1956, 0.0668<br>Far: 0, 0.071, 0.1906, 0.1104, 0.0522   |



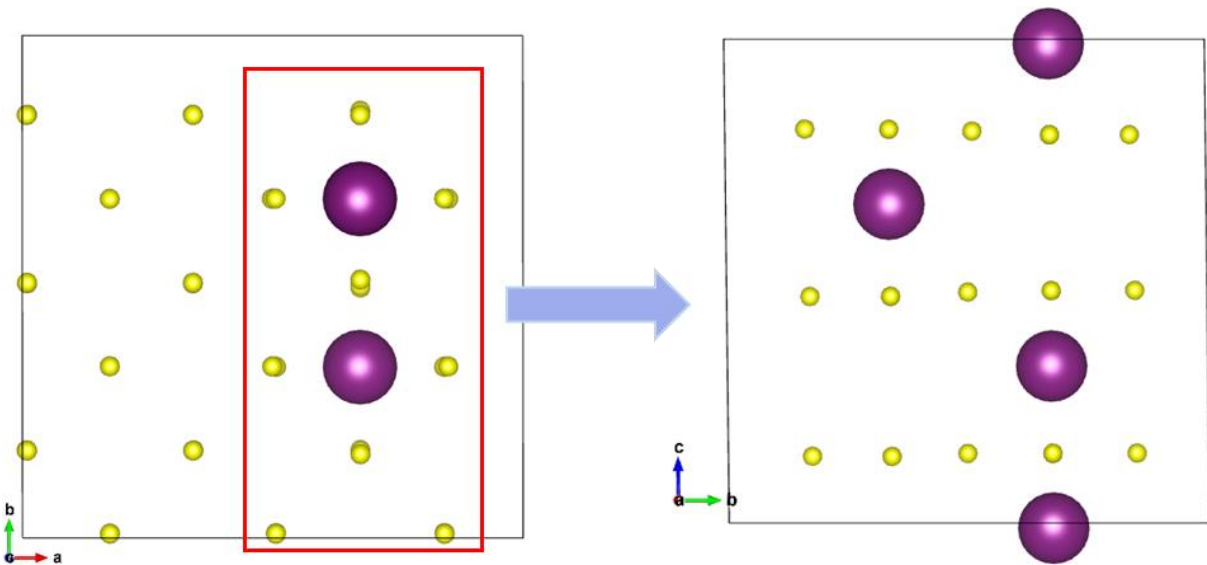

**Figure S4.** Lithium atom positions from the c-axis in  $\text{Li}_2\text{OHCl}_{8/9}\text{I}_{1/9}$ .

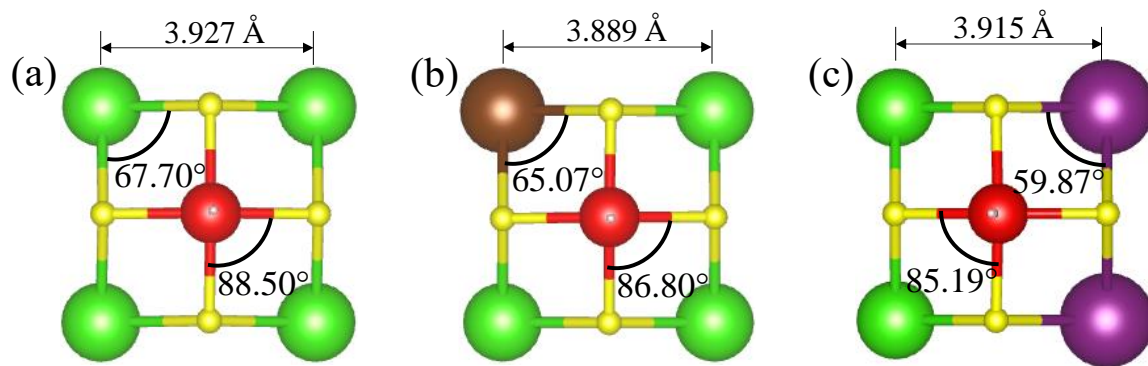

**Figure S5.** The local bond length and bond angles of (a)  $\text{Li}_2\text{OHCl}$ ; (b)  $\text{Li}_2\text{OHCl}_{26/27}\text{Br}_{1/27}$ ; (c)  $\text{Li}_2\text{OHCl}_{25/27}\text{I}_{2/27}$ .

**Table S13.** Fractional coordinates of 15 Li atoms on the c-axis.

|        | Fractional coordinate |         |         |         |         |
|--------|-----------------------|---------|---------|---------|---------|
| Up     | 0.81404               | 0.81380 | 0.81001 | 0.80282 | 0.80272 |
| Middle | 0.46850               | 0.46921 | 0.47770 | 0.48102 | 0.48133 |
| down   | 0.13862               | 0.13832 | 0.14458 | 0.14520 | 0.14542 |

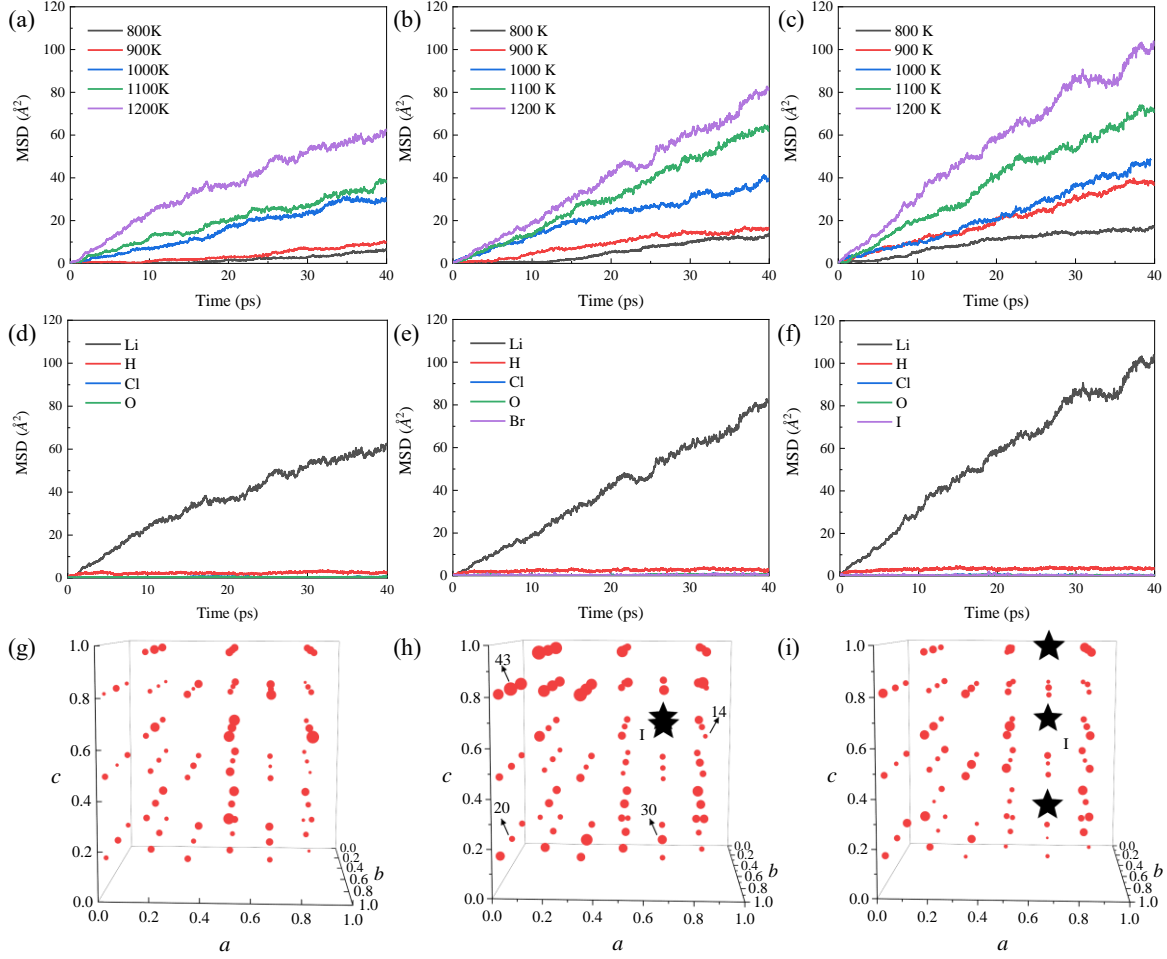

**Figure S6.** MSD of (a)  $\text{Li}_2\text{OHCl}$ , (b)  $\text{Li}_2\text{OHCl}_{26/27}\text{Br}_{1/27}$ , and (c)  $\text{Li}_2\text{OHCl}_{25/27}\text{I}_{2/27}$  at 800, 900, 1000, 1100, and 1200 K; MSD of Li, H, Cl, O, Br, and I atoms of (d)  $\text{Li}_2\text{OHCl}$ , (e)  $\text{Li}_2\text{OHCl}_{26/27}\text{Br}_{1/27}$ , and (f)  $\text{Li}_2\text{OHCl}_{25/27}\text{I}_{2/27}$  at 1200 K;  $\text{Li}^+$  mobility of (g)  $\text{Li}_2\text{OHCl}$ , (h)  $\text{Li}_2\text{OHCl}_{25/27}\text{I}_{2/27}$ , and (i)  $\text{Li}_2\text{OHCl}_{8/9}\text{I}_{1/9}$  at 1200 K. Li and I sites are marked as red circles and black stars, respectively. The size of the circles scales linearly with the number of  $\text{Li}^+$  hops.

**Table S14.** The average number of Li atoms hops from 10 ps to 40 ps as an indication of mobility.

| Electrolyte                                              | The average number of Li hops |
|----------------------------------------------------------|-------------------------------|
| Li <sub>2</sub> OHCl                                     | 20.85                         |
| Li <sub>2</sub> OHCl <sub>26/27</sub> Br <sub>1/27</sub> | 23.40                         |
| Li <sub>2</sub> OHCl <sub>25/27</sub> I <sub>2/27</sub>  | 26.11                         |
| Li <sub>2</sub> OHCl <sub>8/9</sub> I <sub>1/9</sub>     | 21.12                         |

## 4 Elastic properties

**Table S15.** Elastic properties and Pugh's ratios of  $\text{Li}_2\text{OHCl}$ ,  $\text{Li}_2\text{OHCl}_{1-x}\text{Br}_x$ , and  $\text{Li}_2\text{OHCl}_{1-x}\text{I}_x$ .

| Electrolyte                                      | $B$ / GPa | $G$ / GPa | $E$ / GPa | $B/G$ |
|--------------------------------------------------|-----------|-----------|-----------|-------|
| $\text{Li}_2\text{OHCl}$                         | 30.48     | 17.32     | 43.68     | 1.76  |
| $\text{Li}_2\text{OHCl}_{26/27}\text{Br}_{1/27}$ | 29.34     | 14.45     | 37.24     | 2.03  |
| $\text{Li}_2\text{OHCl}_{25/27}\text{Br}_{2/27}$ | 25.44     | 12.35     | 31.89     | 2.06  |
| $\text{Li}_2\text{OHCl}_{8/9}\text{Br}_{1/9}$    | 29.40     | 16.10     | 40.85     | 1.83  |
| $\text{Li}_2\text{OHCl}_{26/27}\text{I}_{1/27}$  | 24.88     | 13.89     | 35.13     | 1.79  |
| $\text{Li}_2\text{OHCl}_{25/27}\text{I}_{2/27}$  | 24.93     | 12.71     | 32.60     | 1.96  |
| $\text{Li}_2\text{OHCl}_{8/9}\text{I}_{1/9}$     | 29.03     | 16.45     | 41.50     | 1.76  |

## 5 Experiments

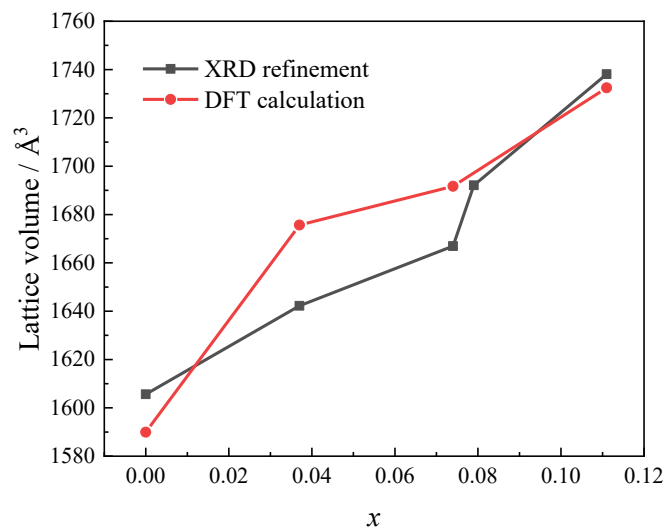

**Figure S7.** Lattice volumes from XRD refinement and DFT calculation.

**Table S16.** Calculated lattice constants from XRD refinement and DFT calculation.

|                                                  | XRD refinement                               | DFT calculation | Error  |
|--------------------------------------------------|----------------------------------------------|-----------------|--------|
| $\text{Li}_2\text{OHCl}$                         | a = 3.895 Å                                  | a = 3.942 Å     | -1.19% |
|                                                  | b = 3.902 Å                                  | b = 3.942 Å     | -1.01% |
|                                                  | c = 3.913 Å                                  | c = 3.827 Å     | 2.25%  |
| $\text{Li}_2\text{OHCl}_{26/27}\text{I}_{1/27}$  | a = 11.696 Å                                 | a = 11.664 Å    | 0.27%  |
|                                                  | b = 11.774 Å                                 | b = 11.664 Å    | 0.94%  |
|                                                  | c = 11.925 Å                                 | c = 12.316 Å    | -3.17% |
| $\text{Li}_2\text{OHCl}_{25/27}\text{I}_{2/27}$  | a = 11.686 Å                                 | a = 11.680 Å    | 0.05%  |
|                                                  | b = 11.782 Å                                 | b = 11.698 Å    | 0.72%  |
|                                                  | c = 12.107 Å                                 | c = 12.381 Å    | -3.38% |
| $\text{Li}_2\text{OHCl}_{0.921}\text{I}_{0.079}$ | a = 11.713 Å<br>b = 11.791 Å<br>c = 12.252 Å | N/A             | N/A    |
| $\text{Li}_2\text{OHCl}_{8/9}\text{I}_{1/9}$     | a = 11.780 Å                                 | a = 11.674 Å    | 0.91%  |
|                                                  | b = 11.690 Å                                 | b = 11.673 Å    | 0.15%  |
|                                                  | c = 12.622 Å                                 | c = 12.713 Å    | -0.72% |



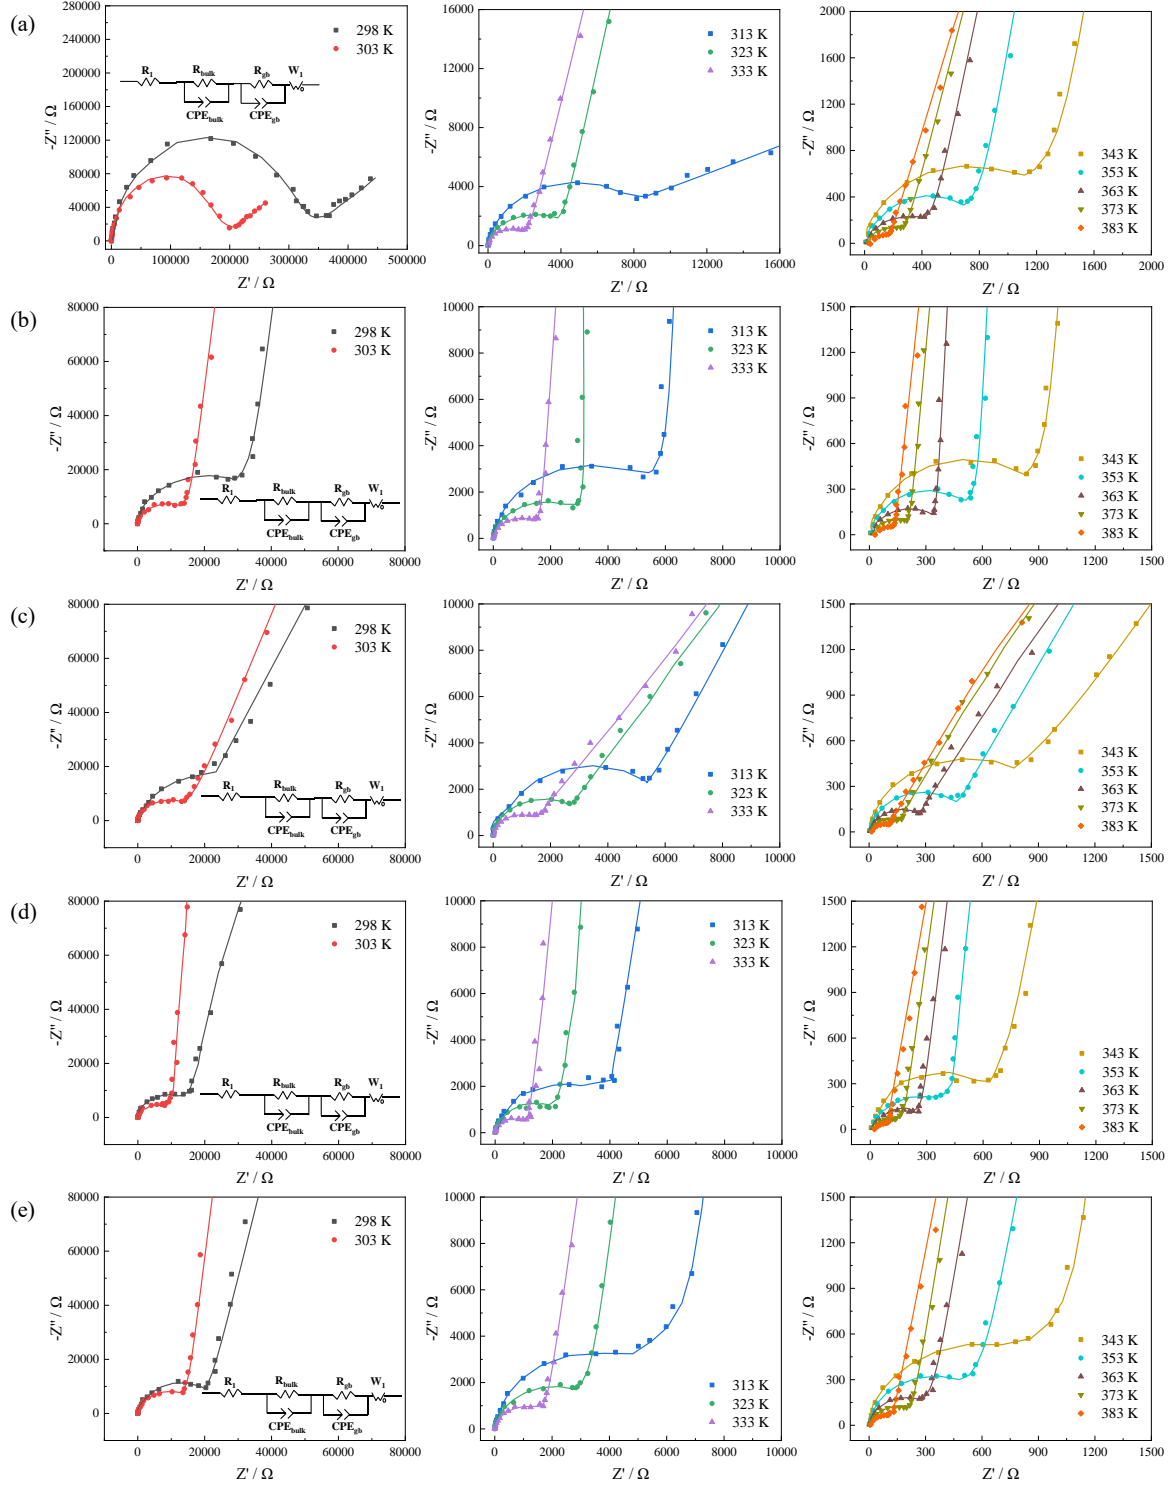

**Figure S8.** The EIS spectra of (a)  $\text{Li}_2\text{OHCl}$ , (b)  $\text{Li}_2\text{OHCl}_{26/27}\text{I}_{1/27}$ , (c)  $\text{Li}_2\text{OHCl}_{25/27}\text{I}_{2/27}$ , (d)  $\text{Li}_2\text{OHCl}_{0.921}\text{I}_{0.079}$ , and (e)  $\text{Li}_2\text{OHCl}_{8/9}\text{I}_{1/9}$ .

**Table S17.** Average thickness and diameter of tested pellets.

|                                                  | Average thickness / mm | Average diameter / mm |
|--------------------------------------------------|------------------------|-----------------------|
| $\text{Li}_2\text{OHCl}$                         | 1.153                  | 14.067                |
| $\text{Li}_2\text{OHCl}_{26/27}\text{I}_{1/27}$  | 1.087                  | 14.143                |
| $\text{Li}_2\text{OHCl}_{25/27}\text{I}_{2/27}$  | 1.177                  | 14.117                |
| $\text{Li}_2\text{OHCl}_{0.921}\text{I}_{0.079}$ | 1.107                  | 14.180                |
| $\text{Li}_2\text{OHCl}_{8/9}\text{I}_{1/9}$     | 1.093                  | 14.233                |

**Table S18.** Ionic conductivity and activation energy ( $T > 313$  K) of  $\text{Li}_2\text{OHCl}$ ,  $\text{Li}_2\text{OHCl}_{26/27}\text{I}_{1/27}$ ,  $\text{Li}_2\text{OHCl}_{25/27}\text{I}_{2/27}$ ,  $\text{Li}_2\text{OHCl}_{0.921}\text{I}_{0.079}$  and  $\text{Li}_2\text{OHCl}_{8/9}\text{I}_{1/9}$  from 298 K to 383 K.

| T (K)      | Ionic conductivity (mS/cm) |                                                 |                                                 |                                                  |                                              |
|------------|----------------------------|-------------------------------------------------|-------------------------------------------------|--------------------------------------------------|----------------------------------------------|
|            | $\text{Li}_2\text{OHCl}$   | $\text{Li}_2\text{OHCl}_{26/27}\text{I}_{1/27}$ | $\text{Li}_2\text{OHCl}_{25/27}\text{I}_{2/27}$ | $\text{Li}_2\text{OHCl}_{0.921}\text{I}_{0.079}$ | $\text{Li}_2\text{OHCl}_{8/9}\text{I}_{1/9}$ |
| 298        | $2.49 \times 10^{-4}$      | $2.39 \times 10^{-3}$                           | $4.03 \times 10^{-3}$                           | $5.28 \times 10^{-3}$                            | $3.43 \times 10^{-3}$                        |
| 303        | $4.28 \times 10^{-4}$      | $5.87 \times 10^{-3}$                           | $7.26 \times 10^{-3}$                           | $8.37 \times 10^{-3}$                            | $5.72 \times 10^{-3}$                        |
| 313        | $8.39 \times 10^{-3}$      | $1.37 \times 10^{-2}$                           | $1.64 \times 10^{-2}$                           | $1.91 \times 10^{-2}$                            | $1.27 \times 10^{-2}$                        |
| 323        | $1.93 \times 10^{-2}$      | $2.70 \times 10^{-2}$                           | $3.31 \times 10^{-2}$                           | $3.33 \times 10^{-2}$                            | $2.46 \times 10^{-2}$                        |
| 333        | $3.73 \times 10^{-2}$      | $4.85 \times 10^{-2}$                           | $6.33 \times 10^{-2}$                           | $6.57 \times 10^{-2}$                            | $4.59 \times 10^{-2}$                        |
| 343        | $6.90 \times 10^{-2}$      | $8.70 \times 10^{-2}$                           | $1.17 \times 10^{-1}$                           | $1.11 \times 10^{-1}$                            | $7.92 \times 10^{-2}$                        |
| 353        | $1.10 \times 10^{-1}$      | $1.43 \times 10^{-1}$                           | $1.84 \times 10^{-1}$                           | $2.01 \times 10^{-1}$                            | $1.44 \times 10^{-1}$                        |
| 363        | $1.79 \times 10^{-1}$      | $2.24 \times 10^{-1}$                           | $3.30 \times 10^{-1}$                           | $3.08 \times 10^{-1}$                            | $2.28 \times 10^{-1}$                        |
| 373        | $2.86 \times 10^{-1}$      | $3.82 \times 10^{-1}$                           | $4.71 \times 10^{-1}$                           | $5.04 \times 10^{-1}$                            | $3.46 \times 10^{-1}$                        |
| 383        | $5.11 \times 10^{-1}$      | $5.90 \times 10^{-1}$                           | $8.09 \times 10^{-1}$                           | $8.32 \times 10^{-1}$                            | $5.56 \times 10^{-1}$                        |
| $E_a$ (eV) | 0.6050                     | 0.5804                                          | 0.5974                                          | 0.5876                                           | 0.5862                                       |

**Table S19.** Bulk conductivity and activation energy ( $T > 313$  K) of  $\text{Li}_2\text{OHCl}$ ,  $\text{Li}_2\text{OHCl}_{26/27}\text{I}_{1/27}$ ,  $\text{Li}_2\text{OHCl}_{25/27}\text{I}_{2/27}$ ,  $\text{Li}_2\text{OHCl}_{0.921}\text{I}_{0.079}$  and  $\text{Li}_2\text{OHCl}_{8/9}\text{I}_{1/9}$  from 298 K to 383 K.

| T (K)        | Bulk conductivity (mS/cm) |                                                 |                                                 |                                                  |                                              |
|--------------|---------------------------|-------------------------------------------------|-------------------------------------------------|--------------------------------------------------|----------------------------------------------|
|              | $\text{Li}_2\text{OHCl}$  | $\text{Li}_2\text{OHCl}_{26/27}\text{I}_{1/27}$ | $\text{Li}_2\text{OHCl}_{25/27}\text{I}_{2/27}$ | $\text{Li}_2\text{OHCl}_{0.921}\text{I}_{0.079}$ | $\text{Li}_2\text{OHCl}_{8/9}\text{I}_{1/9}$ |
| 298          | $1.14 \times 10^{-3}$     | $8.90 \times 10^{-3}$                           | $1.67 \times 10^{-2}$                           | $1.74 \times 10^{-2}$                            | $1.48 \times 10^{-2}$                        |
| 303          | $1.65 \times 10^{-3}$     | $2.67 \times 10^{-2}$                           | $3.19 \times 10^{-2}$                           | $3.36 \times 10^{-2}$                            | $2.73 \times 10^{-2}$                        |
| 313          | $3.09 \times 10^{-2}$     | $5.82 \times 10^{-2}$                           | $6.55 \times 10^{-2}$                           | $6.60 \times 10^{-2}$                            | $4.44 \times 10^{-2}$                        |
| 323          | $6.25 \times 10^{-2}$     | $1.07 \times 10^{-1}$                           | $1.04 \times 10^{-1}$                           | $1.04 \times 10^{-1}$                            | $8.32 \times 10^{-2}$                        |
| 333          | $1.04 \times 10^{-1}$     | $2.00 \times 10^{-1}$                           | $1.67 \times 10^{-1}$                           | $1.72 \times 10^{-1}$                            | $1.36 \times 10^{-1}$                        |
| 343          | $2.07 \times 10^{-1}$     | $3.55 \times 10^{-1}$                           | $3.23 \times 10^{-1}$                           | $3.96 \times 10^{-1}$                            | $2.57 \times 10^{-1}$                        |
| 353          | $3.37 \times 10^{-1}$     | $5.15 \times 10^{-1}$                           | $4.46 \times 10^{-1}$                           | $7.06 \times 10^{-1}$                            | $4.15 \times 10^{-1}$                        |
| 363          | $5.20 \times 10^{-1}$     | $6.77 \times 10^{-1}$                           | $9.81 \times 10^{-1}$                           | $1.15 \times 10^0$                               | $7.55 \times 10^{-1}$                        |
| 373          | $7.85 \times 10^{-1}$     | $1.04 \times 10^0$                              | $2.08 \times 10^0$                              | $2.31 \times 10^0$                               | $1.09 \times 10^0$                           |
| 383          | $1.43 \times 10^0$        | $1.85 \times 10^0$                              | $3.69 \times 10^0$                              | $3.42 \times 10^0$                               | $1.60 \times 10^0$                           |
| $E_a^b$ (eV) | 0.5829                    | 0.5294                                          | 0.5477                                          | 0.5836                                           | 0.5569                                       |

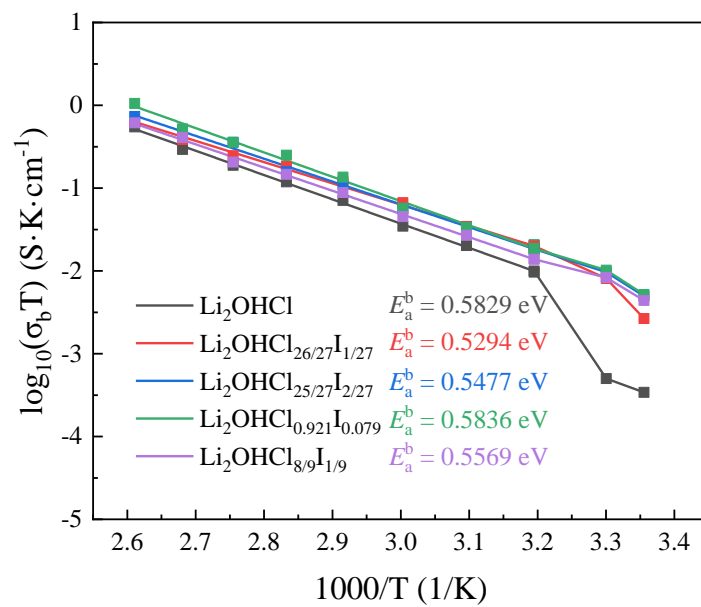

**Figure S9.** Arrhenius plot of bulk conductivity.

**Table S20.** Grain boundary conductivity and activation energy ( $T > 313$  K) of  $\text{Li}_2\text{OHCl}$ ,  $\text{Li}_2\text{OHCl}_{26/27}\text{I}_{1/27}$ ,  $\text{Li}_2\text{OHCl}_{25/27}\text{I}_{2/27}$ ,  $\text{Li}_2\text{OHCl}_{0.921}\text{I}_{0.079}$  and  $\text{Li}_2\text{OHCl}_{8/9}\text{I}_{1/9}$  from 298 K to 383 K.

| T (K)                  | Grain boundary conductivity (mS/cm) |                                                 |                                                 |                                                  |                                              |
|------------------------|-------------------------------------|-------------------------------------------------|-------------------------------------------------|--------------------------------------------------|----------------------------------------------|
|                        | $\text{Li}_2\text{OHCl}$            | $\text{Li}_2\text{OHCl}_{26/27}\text{I}_{1/27}$ | $\text{Li}_2\text{OHCl}_{25/27}\text{I}_{2/27}$ | $\text{Li}_2\text{OHCl}_{0.921}\text{I}_{0.079}$ | $\text{Li}_2\text{OHCl}_{8/9}\text{I}_{1/9}$ |
| 298                    | $3.50 \times 10^{-4}$               | $2.67 \times 10^{-3}$                           | $4.75 \times 10^{-3}$                           | $5.52 \times 10^{-3}$                            | $3.81 \times 10^{-3}$                        |
| 303                    | $5.00 \times 10^{-4}$               | $6.46 \times 10^{-3}$                           | $7.54 \times 10^{-3}$                           | $8.78 \times 10^{-3}$                            | $6.10 \times 10^{-3}$                        |
| 313                    | $8.64 \times 10^{-3}$               | $1.41 \times 10^{-2}$                           | $1.71 \times 10^{-2}$                           | $2.00 \times 10^{-2}$                            | $1.41 \times 10^{-2}$                        |
| 323                    | $2.29 \times 10^{-2}$               | $2.88 \times 10^{-2}$                           | $3.50 \times 10^{-2}$                           | $3.58 \times 10^{-2}$                            | $2.64 \times 10^{-2}$                        |
| 333                    | $4.51 \times 10^{-2}$               | $5.04 \times 10^{-2}$                           | $6.82 \times 10^{-2}$                           | $6.89 \times 10^{-2}$                            | $4.76 \times 10^{-2}$                        |
| 343                    | $7.36 \times 10^{-2}$               | $9.00 \times 10^{-2}$                           | $1.30 \times 10^{-1}$                           | $1.21 \times 10^{-1}$                            | $8.50 \times 10^{-2}$                        |
| 353                    | $1.15 \times 10^{-1}$               | $1.50 \times 10^{-1}$                           | $1.94 \times 10^{-1}$                           | $2.23 \times 10^{-1}$                            | $1.74 \times 10^{-1}$                        |
| 363                    | $1.88 \times 10^{-1}$               | $2.44 \times 10^{-1}$                           | $3.50 \times 10^{-1}$                           | $3.25 \times 10^{-1}$                            | $2.77 \times 10^{-1}$                        |
| 373                    | $3.10 \times 10^{-1}$               | $4.01 \times 10^{-1}$                           | $5.01 \times 10^{-1}$                           | $5.43 \times 10^{-1}$                            | $3.68 \times 10^{-1}$                        |
| 383                    | $5.65 \times 10^{-1}$               | $6.11 \times 10^{-1}$                           | $8.31 \times 10^{-1}$                           | $8.66 \times 10^{-1}$                            | $6.03 \times 10^{-1}$                        |
| $E_a^{\text{gb}}$ (eV) | 0.5927                              | 0.6194                                          | 0.6185                                          | 0.6111                                           | 0.6155                                       |

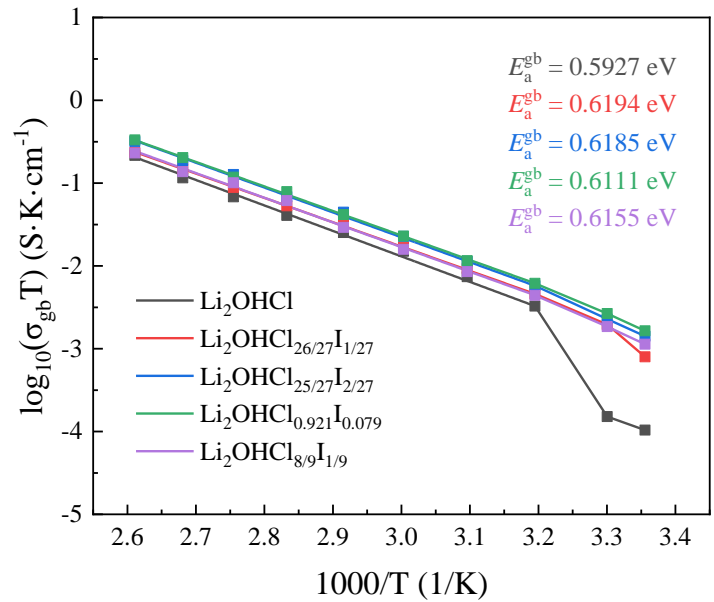

**Figure S10.** Arrhenius plot of grain boundary conductivity.

**Table S21.** The predicted highest ionic conductivity and the corresponding volumetric strain from 313 K to 383 K by GPR.

| T (K) | Volumetric strain | Predicted ionic conductivity (mS/cm) |
|-------|-------------------|--------------------------------------|
| 313   | 0.0533            | 0.0176                               |
| 323   | 0.0563            | 0.0374                               |
| 333   | 0.0584            | 0.0780                               |
| 343   | 0.0584            | 0.1493                               |
| 353   | 0.0590            | 0.2249                               |
| 363   | 0.0592            | 0.4609                               |
| 373   | 0.0570            | 0.5409                               |
| 383   | 0.0591            | 1.0857                               |



**Table S22.** The predicted highest ionic conductivity and the corresponding composition from 313 K to 383 K by GPR.

| T (K) | Composition                                      | Predicted ionic conductivity (mS/cm) |
|-------|--------------------------------------------------|--------------------------------------|
| 313   | $\text{Li}_2\text{OHCl}_{0.928}\text{I}_{0.072}$ | 0.017                                |
| 323   | $\text{Li}_2\text{OHCl}_{0.926}\text{I}_{0.074}$ | 0.034                                |
| 333   | $\text{Li}_2\text{OHCl}_{0.920}\text{I}_{0.080}$ | 0.064                                |
| 343   | $\text{Li}_2\text{OHCl}_{0.919}\text{I}_{0.081}$ | 0.119                                |
| 353   | $\text{Li}_2\text{OHCl}_{0.919}\text{I}_{0.081}$ | 0.188                                |
| 363   | $\text{Li}_2\text{OHCl}_{0.916}\text{I}_{0.084}$ | 0.343                                |
| 373   | $\text{Li}_2\text{OHCl}_{0.925}\text{I}_{0.075}$ | 0.477                                |
| 383   | $\text{Li}_2\text{OHCl}_{0.917}\text{I}_{0.083}$ | 0.834                                |

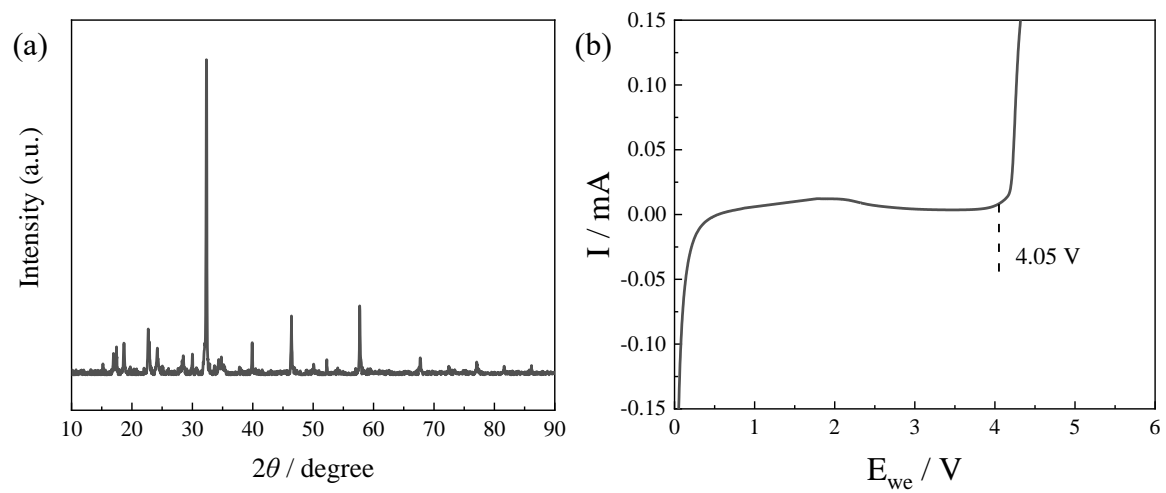

**Figure S11** (a) XRD pattern, and (b) LSV curve of  $\text{Li}_2\text{OHCl}_{0.921}\text{I}_{0.079}$ .
